# Supplementary material for: GC Insights: Lessons from participatory water quality research in the upper Santa River basin, Peru
Source: Copernicus journal article supplement (doi:10.5194/gc-7-145-2024), 2024-06-27
Supplement: Supplementary file 1 [file gc-7-145-2024-supplement.pdf]

Supplement of Geosci. Commun., 7, 145–150, 2024  
<https://doi.org/10.5194/gc-7-145-2024-supplement>  
© Author(s) 2024. CC BY 4.0 License.

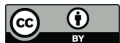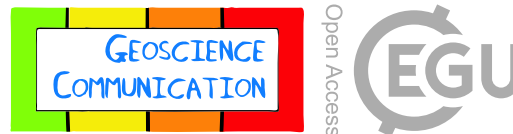

*Supplement of*

## **GC Insights: Lessons from participatory water quality research in the upper Santa River basin, Peru**

**Sally Rangecroft et al.**

*Correspondence to:* Sally Rangecroft ([s.rangecroft@exeter.ac.uk](mailto:s.rangecroft@exeter.ac.uk))

The copyright of individual parts of the supplement might differ from the article licence.

## **Supplementary material: Nuestro Rio survey**

*[Please note that this is the English translation for the Supplementary material; the original questions on the Nuestro Rio app were in Spanish]*

### **START**

*[Participant to take photo of water]*

### **SECTION 1 – About your photograph**

**Q1:** What is this river or stream called? (Do you have any other names for it?) [open text]

**Q2:** On a scale of (1) "very bad" to (5) "very good", how would you rate the water quality of the river or stream?

1 Very bad

2 Bad

3 OK (Neutral)

4 Good

5 Very good

Don't know

**Q3:** Why do you think the water quality of the river or stream is like this? There is no right or wrong answer, we just want to hear your opinion. If you are not sure, please just write "I don't know". [open text]

### **SECTION 2 – Your photograph**

What do you feel when you see the water of the river or stream? For each of the following moods, please record how you feel on a scale of (1) Not at all, to (5) Extremely.

**Q4:** ANGRY?

1 Not at all

2 A little

3 Neither yes, or no (Neutral)

4 Very

5 Extremely

Don't know

**Q5: AFRAID?**

1 Not at all

2 A little

3 Neither yes, or no (Neutral)

4 Very

5 Extremely

Don't know

**Q6: HAPPY?**

1 Not at all

2 A little

3 Neither yes, or no (Neutral)

4 Very

5 Extremely

Don't know

**Q7: SAD?**

1 Not at all

2 A little

3 Neither yes, or no (Neutral)

4 Very

5 Extremely

Don't know

**Q8: SURPRISED?**

1 Not at all

2 A little

3 Neither yes, or no (Neutral)

4 Very

5 Extremely

Don't know

**SECTION 3 – About you**

**Q9:** Where do you live (name of place)? [open text]

**Q10:** What is your age? [open text]

**Q11:** Please indicate your gender: [multiple choice]

Male

Female

Choose not to identify

Other

**Q12:** What is your MAIN occupation – CHOOSE ONE [multiple choice]

Agriculture/livestock

Teaching

Student

Commerce/business

Public administration (Civil servant)

Mining (or related)

Transport

Household work

Other

Other please specify (Optional) [open text]

**END**
